# Supplementary material for: Efficacy and Safety of Rituximab in Autoimmune Disease—Associated Interstitial Lung Disease: A Prospective Cohort Study
Source: MDPI journal article supplement (doi:10.3390/jcm11040927), 2022-02-10
Supplement: s1 [file s1]

**Supplementary Table S1:** Previous treatment in 37 patients with CTD-ILD receiving rituximab.

| Variable                                         | Total<br><i>n</i> =37 | RA<br><i>n</i> =19 | SS<br><i>n</i> =14 | IM<br><i>n</i> =4 | <i>p</i> Value |
|--------------------------------------------------|-----------------------|--------------------|--------------------|-------------------|----------------|
| csDMARD, <i>n</i> (%)                            | 23 (62.0)             | 18 (94.7)          | 4 (28.6)           | 1 (25.0)          | <0.001         |
| Methotrexate, <i>n</i> (%)                       | 20 (54.1)             | 17 (89.5)          | 3 (21.4)           | 0 (0.0)           | <0.001         |
| Leflunomide, <i>n</i> (%)                        | 9 (24.3)              | 9 (47.4)           | 0 (0.0)            | 0 (0.0)           | 0.004          |
| Sulfasalazine, <i>n</i> (%)                      | 5 (13.5)              | 5 (26.3)           | 0 (0.0)            | 0 (0.0)           | 0.065          |
| Hydroxychloroquine, <i>n</i> (%)                 | 5 (13.5)              | 3 (15.8)           | 1 (7.1)            | 1 (25.0)          | 0.600          |
| No. of previous csDMARDs, median (IQR)           | 1.0 (0.0-2.0)         | 2.0 (1.0-3.0)      | 0.0 (0.0-1.0)      | 0.0 (0.0-0.7)     | <0.001         |
| bDMARDs                                          | 11 (29.7)             | 11 (57.9)          | 0 (0.0)            | 0 (0.0)           | 0.001          |
| Infliximab, <i>n</i> (%)                         | 2 (5.4)               | 2 (10.5)           | 0 (0.0)            | 0 (0.0)           | 0.367          |
| Etanercept, <i>n</i> (%)                         | 4 (10.8)              | 4 (21.1)           | 0 (0.0)            | 0 (0.0)           | 0.120          |
| Adalimumab, <i>n</i> (%)                         | 3 (8.1)               | 3 (15.8)           | 0 (0.0)            | 0 (0.0)           | 0.213          |
| Tocilizumab, <i>n</i> (%)                        | 1 (2.7)               | 1 (5.3)            | 0 (0.0)            | 0 (0.0)           | 0.615          |
| Abatacept, <i>n</i> (%)                          | 1 (2.7)               | 1 (5.3)            | 0 (0.0)            | 0 (0.0)           | 0.615          |
| No. of previous bDMARDs, median (IQR)            | 0.0 (0.0-1.0)         | 1.0 (0.0-2.0)      | 0.0 (0.0-0.0)      | 0.0 (0.0-0.0)     | 0.001          |
| Immunosuppressants                               | 16 (43.2)             | 7 (36.8)           | 8 (57.1)           | 1 (25.0)          | 0.375          |
| Mycophenolate, <i>n</i> (%)                      | 7 (18.9)              | 0 (0.0)            | 7 (50.0)           | 0 (0.0)           | 0.001          |
| Azathioprine, <i>n</i> (%)                       | 9 (24.3)              | 3 (15.8)           | 5 (35.7)           | 1 (25.0)          | 0.419          |
| Cyclophosphamide, <i>n</i> (%)                   | 8 (21.6)              | 4 (21.1)           | 4 (28.6)           | 0 (0.0)           | 0.471          |
| No. of previous immunosuppressants, median (IQR) | 1.0 (0.0-1.0)         | 0.0 (0.0-1.0)      | 1.0 (0.0-2.2)      | 0.0 (0.0-1.0)     | 0.033          |

Abbreviations: CTD: connective tissue disease; ILD: interstitial lung disease; RA: rheumatoid arthritis; IM: inflammatory myopathy; SS: systemic sclerosis; csDMARD: conventional synthetic disease-modifying antirheumatic drug; bDMARD: biologic DMARD; IQR: interquartile range. Statistical tests used: Pearson chi-squared ( $\chi^2$ ), ANOVA, and Kruskal-Wallis.

**Supplementary Table S2:** Characteristics of patients with CTD-ILD receiving treatment with rituximab who died.

| Patient   | Type of CTD | Age (years) | Time since onset<br>of ILD (months) | Treatment                             | Time receiving<br>rituximab<br>(months) | Cause of death                                     |
|-----------|-------------|-------------|-------------------------------------|---------------------------------------|-----------------------------------------|----------------------------------------------------|
| Patient 1 | RA          | 73.1        | 93.2                                | Rituximab                             | 71.8                                    | Progression of ILD and<br>pulmonary superinfection |
| Patient 2 | RA          | 73.9        | 77.6                                | Rituximab and hydroxychloro-<br>quine | 23.4                                    | Progression of ILD and<br>pulmonary superinfection |
| Patient 3 | RA          | 64.2        | 81.0                                | Rituximab and sulfasalazine           | 74.1                                    | Progression of ILD and<br>pulmonary superinfection |
| Patient 4 | RA          | 78.5        | 85.8                                | Rituximab and mycophenolate           | 12.0                                    | Progression of ILD                                 |
| Patient 5 | RA          | 76.5        | 57.2                                | Rituximab                             | 60.1                                    | Progression of ILD and<br>pulmonary superinfection |
| Patient 6 | RA          | 53.3        | 124.6                               | Rituximab and hydroxychloro-<br>quine | 80.2                                    | Progression of ILD                                 |
| Patient 7 | SS          | 58.1        | 28.5                                | Rituximab and methotrexate            | 24.0                                    | Progression of ILD                                 |

Abbreviations: SAD: systemic autoimmune disease; ILD: interstitial lung disease; RA: rheumatoid arthritis; SS: systemic sclerosis.

**Supplementary Table S3:** Pulmonary function results at ILD diagnosis and at baseline in patients with CTD-ILD.

| Variable                 |               | Total<br><i>n</i> =37 | RA<br><i>n</i> =19 | SS<br><i>n</i> =14 | IM<br><i>n</i> =4 | <i>p</i> Value |
|--------------------------|---------------|-----------------------|--------------------|--------------------|-------------------|----------------|
| Pulmonary function tests |               |                       |                    |                    |                   |                |
| FVC, mean (SD)           | ILD-diagnosis | 73.5 (16.9)           | 73.0 (13.1)        | 73.9(21.7)         | 82.7 (14.5)       | 0.485          |
|                          | Baseline      | 72.2 (21.3)*          | 69.1 (15.0)*       | 71.6(21.7)*        | 79.0 (15.0)*      | 0.644          |
| FEV1, mean (SD)          | ILD-diagnosis | 76.1 (18.1)           | 72.0 (16.9)        | 79.7 (21.7)        | 85.0 (3.5)        | 0.332          |
|                          | Baseline      | 73.0 (18.8)*          | 69.8 (16.0)*       | 76.9 (24.9)*       | 76.2 (7.5)*       | 0.570          |
| DLCO-SB, mean (SD)       | ILD-diagnosis | 58.3 (16.1)           | 58.1 (18.4)        | 54.8 (15.6)        | 61.2 (7.0)        | 0.890          |
|                          | Baseline      | 55.9 (15.7)*          | 56.2 (17.7)*       | 52.8 (15.6)*       | 58.0 (5.0)*       | 0.935          |

Abbreviations: CTD: connective tissue disease; ILD: interstitial lung disease; RA: rheumatoid arthritis; IM: inflammatory myopathy; SS: systemic sclerosis; FVC: forced vital capacity; FEV1: forced expiratory volume in the first second; DLCO: diffusing capacity of the lungs for carbon dioxide; \**p*<0.005 ILD diagnosis vs baseline; Statistical tests used: Pearson chi-squared ( $\chi^2$ ), ANOVA, Kruskal-Wallis, paired t test, and Wilcoxon test.

**Supplementary Table S4:** Factors associated with pulmonary outcomes in patients with CTD-ILD receiving rituximab.

| Variable                                   | Improvement stabilization (n=23) | Progression-death (n=14) | p Value      |
|--------------------------------------------|----------------------------------|--------------------------|--------------|
| <i>Epidemiological characteristics</i>     |                                  |                          |              |
| Sex, female, n (%)                         | 16 (69.6)                        | 11 (78.6)                | 0.550        |
| Age in years, mean (SD)                    | 61.2 (9.9)                       | 65.4 (9.6)               | 0.224        |
| Race, Caucasian, n (%)                     | 23 (100.0)                       | 13 (92.9)                | 0.194        |
| <i>Clinical-analytical characteristics</i> |                                  |                          |              |
| Smoking                                    |                                  |                          | 0.286        |
| Never smoked, n (%)                        | 14 (60.9)                        | 6 (42.9)                 |              |
| Smoked, n (%)                              | 9 (39.1)                         | 8 (57.1)                 |              |
| Duration of CTD, months, median (IQR)      | 79.0 (41.6-180.0)                | 130.9 (87.3-200.8)       | 0.139        |
| Duration of ILD, months, median (IQR)      | 54.9 (26.0-93.4)                 | 86.5 (51.9-130.8)        | <b>0.046</b> |
| RF-positive (>10) n (%)                    | 10 (43.5)                        | 9 (64.3)                 | 0.219        |
| ACPA (<20), n (%)                          | 9 (39.1)                         | 9 (64.3)                 | 0.138        |
| ANA-positive, n (%)                        | 16 (69.6)                        | 8 (57.1)                 | 0.443        |
| Anti-scl70, n (%)                          | 4 (17.4)                         | 3 (21.4)                 | 0.761        |
| Anticentromere, n (%)                      | 4 (17.4)                         | 0 (0.0)                  | 0.098        |
| Anti-RNA polymerase 3, n (%)               | 1 (4.3)                          | 0 (0.0)                  | 0.429        |
| Anti Ku, n (%)                             | 1 (4.3)                          | 0 (0.0)                  | 0.429        |
| Anti-PL7, n (%)                            | 2 (8.7)                          | 0 (0.0)                  | 0.257        |
| Anti-EJ, n (%)                             | 1 (4.3)                          | 0 (0.0)                  | 0.429        |
| Anti-TIF, n (%)                            | 1 (4.3)                          | 0 (0.0)                  | 0.429        |
| <i>Radiological pattern</i>                |                                  |                          |              |
| UIP, n (%)                                 | 9 (39.1)                         | 9 (64.3)                 | 0.284        |
| NSIP, n (%)                                | 13 (56.5)                        | 5 (35.7)                 |              |
| Fibrotic NSIP, n (%)                       | 1 (4.3)                          | 0 (0.0)                  |              |
| <i>Baseline pulmonary function tests</i>   |                                  |                          |              |
| FVC, mean (SD)                             | 75.5 (19.0)                      | 61.7 (14.7)              | <b>0.045</b> |
| FVC<80%, n (%)                             | 12 (52.2)                        | 12 (85.7)                | <b>0.038</b> |
| FEV <sub>1</sub> , mean (SD)               | 75.9 (18.5)                      | 69.1 (19.6)              | 0.248        |
| DLCO-SB, mean (SD)                         | 59.8 (16.0)                      | 49.5 (13.3)              | <b>0.036</b> |
| <i>Treatment</i>                           |                                  |                          |              |
| Time to initiation of RTX*, median (IQR)   | 7.4 (6.0-22.7)                   | 42.4 (14.2-84.6)         | <b>0.016</b> |
| Time with RTX, median (IQR)**              | 38.2 (24.0-63.3)                 | 42.4 (17.0-72.3)         | 0.842        |
| Combination with DMARDs, n (%)             | 9 (39.1)                         | 6 (42.9)                 | 0.823        |
| Methotrexate, n (%)                        | 3 (13.0)                         | 2 (14.3)                 | 0.915        |
| Leflunomide, n (%)                         | 2 (8.7)                          | 0 (0.0)                  | 0.257        |
| Sulfasalazine, n (%)                       | 0 (0.0)                          | 1 (7.1)                  | 0.194        |
| Hydroxychloroquine, n (%)                  | 4 (17.4)                         | 3 (21.4)                 | 0.761        |
| Combination with immunosuppressants, n (%) | 15 (65.2)                        | 5 (35.7)                 | 0.081        |
| Mycophenolate, n (%)                       | 15 (65.2)                        | 4 (28.6)                 | <b>0.031</b> |
| Azathioprine, n (%)                        | 0 (0.0)                          | 1 (7.1)                  | 0.194        |
| Corticosteroids, n (%)                     | 16 (69.6)                        | 9 (64.3)                 | 0.739        |
| Dose of corticosteroids, median (IQR)      | 5.0 (0.0-10.0)                   | 7.5 (5.0-10.0))          | 0.476        |

Abbreviations: CTD: connective tissue disease; ILD: interstitial lung disease; RTX: rituximab; ACPA: anticitrullinated peptide antibody; ANA: antinuclear antibody; FVC: forced vital capacity; FEV<sub>1</sub>: forced expiratory volume in the first second; DLCO: diffusing capacity of the lungs for carbon monoxide; UIP: usual interstitial pneumonia; NSIP: nonspecific interstitial pneumonia; HRCT: high-resolution computed tomography; csDMARD: conventional systemic disease-modifying antirheumatic drug. \* Time from diagnosis of ILD to initiation of treatment with RTX \*\* Time since initiation of treatment with RTX to end of follow-up or death. Statistical tests used: Pearson chi-squared ( $\chi^2$ ), ANOVA, and Kruskal-Wallis.
